# Supplementary material for: Next-generation sequencing identified that RET variation associates with lymph node metastasis and the immune microenvironment in thyroid papillary carcinoma
Source: Springer Nature journal article supplement (doi:10.1186/s12902-024-01586-5), 2024-05-11
Supplement: MOESM1 [file 12902_2024_1586_MOESM1_ESM.pdf]

## Supplementary data

### Supplementary Tables

**Table S1.** Gene list of the thyroid cancer 90-genes panel

| SNV/InDel (89) |        |        |         | Fusion Kinase Domain (9) |
|----------------|--------|--------|---------|--------------------------|
| AKT1           | DOCK9  | MEN1   | ROS1    | ALK                      |
| ALK            | DPYD   | MET    | SF3B1   | BRAF                     |
| APC            | EGFR   | MLH1   | SMAD4   | IGF2BP3                  |
| ATM            | EIF1AX | MSH2   | SMARCA4 | NTRK1                    |
| AXIN1          | EPCAM  | MSH6   | SPOP    | NTRK2                    |
| BMPR1A         | ERBB2  | MUTYH  | STK11   | NTRK3                    |
| BRAF           | ERCC1  | NF1    | TERT    | PPARG                    |
| BRCA1          | ERCC2  | NF2    | TIRAP   | RET                      |
| BRCA2          | ETV6   | NRAS   | TP53    | ROS1                     |
| CCNE1          | EZH1   | NRG3   | TSHR    |                          |
| CDH1           | FBXW7  | NTRK1  | UGT1A1  |                          |
| CDK4           | FGFR1  | NTRK2  | VHL     |                          |
| CDK6           | FRG1BP | PBRM1  | XRCC1   |                          |
| CDKN2A         | GNAS   | PDGFRA | ZNF148  |                          |
| CDKN2B         | GREM1  | PIK3CA |         |                          |
| CDKN2C         | GSTP1  | PMS2   |         |                          |
| CHEK1          | HDAC2  | POLE   |         |                          |
| CHEK2          | HRAS   | PPARG  |         |                          |
| CPAMD8         | IDH1   | PPM1D  |         |                          |
| CTNNB1         | JAK2   | PTEN   |         |                          |
| CYP1B1         | KDM6B  | PTPN11 |         |                          |
| CYP2D6         | KIT    | RB1    |         |                          |
| DDX3X          | KRAS   | RBM10  |         |                          |
| DICER1         | MAP2K1 | RELN   |         |                          |
| DISP2          | MDC1   | RET    |         |                          |

**Table S2.** Top 10 gene variations of 99 PTC patients with and without lymph node metastasis

| Gene variation | N  | Metastasis | Non- metastasis | P      |
|----------------|----|------------|-----------------|--------|
| Total          | 99 | 75         | 24              |        |
| BRAF           |    |            |                 | 0.3861 |
| WT             | 20 | 17         | 3               |        |
| MT             | 79 | 58         | 21              |        |
| RET            |    |            |                 | 0.0341 |
| WT             | 86 | 62         | 24              |        |
| MT             | 13 | 13         | 0               |        |
| BRCA1          |    |            |                 | 0.6303 |
| WT             | 93 | 71         | 22              |        |
| MT             | 6  | 4          | 2               |        |
| POLE           |    |            |                 | 1      |
| WT             | 93 | 70         | 23              |        |
| MT             | 6  | 5          | 1               |        |
| RELN           |    |            |                 | 0.331  |
| WT             | 93 | 69         | 24              |        |
| MT             | 6  | 6          | 0               |        |
| ALK            |    |            |                 | 1      |
| WT             |    | 71         | 23              |        |
| MT             |    | 4          | 1               |        |
| APC            |    |            |                 | 0.0117 |
| WT             | 94 | 74         | 20              |        |
| MT             | 5  | 1          | 4               |        |
| ATM            |    |            |                 | 0.5921 |
| WT             | 94 | 72         | 22              |        |
| MT             | 5  | 3          | 2               |        |
| BRCA2          |    |            |                 | 0.5695 |
| WT             | 95 | 71         | 24              |        |
| MT             | 4  | 4          | 0               |        |
| DISP2          |    |            |                 | 1      |
| WT             | 95 | 72         | 23              |        |
| MT             | 4  | 3          | 1               |        |

WT, Wild type; MT, mutation and gene fusion.

**Table S3.** The clinical factors of 99 PTC patients

| Clinical characteristics | N  | RET status |           | P      |
|--------------------------|----|------------|-----------|--------|
|                          |    | WT         | Variation |        |
| Total                    | 99 | 86         | 13        |        |
| Age                      |    |            |           |        |
| <15                      | 1  | 0          | 1         | 0.001  |
| 15-20                    | 2  | 1          | 1         |        |
| 21-30                    | 20 | 13         | 7         |        |
| 31-40                    | 32 | 31         | 1         |        |
| 41-50                    | 22 | 21         | 1         |        |
| 51-60                    | 17 | 15         | 2         |        |
| >60                      | 5  | 5          | 0         |        |
| Gender                   |    |            |           | 0.7611 |
| Female                   | 61 | 52         | 9         |        |
| Male                     | 38 | 34         | 4         |        |
| Primary tumor site       |    |            |           | 0.6335 |
| Left                     | 27 | 24         | 3         |        |
| Right                    | 36 | 32         | 4         |        |
| Bilateral                | 32 | 26         | 6         |        |
| NA                       | 4  | 4          | 0         |        |
| Pathologic stage         |    |            |           | 0.8229 |
| I                        | 87 | 75         | 12        |        |
| II-IV                    | 9  | 8          | 1         |        |
| NA                       | 3  | 3          | 0         |        |
| Pathologic T             |    |            |           | 0.0132 |
| T1+T2                    | 83 | 75         | 8         |        |
| T3+T4                    | 13 | 8          | 5         |        |
| Tx                       | 3  | 3          | 0         |        |
| Pathologic N             |    |            |           | 0.0286 |
| N0                       | 24 | 24         | 0         |        |
| N1                       | 75 | 62         | 13        |        |
| Pathologic M             |    |            |           |        |
| M0                       | 99 | 86         | 13        |        |
| M1                       | 0  | 0          | 0         |        |

## Supplementary Figures

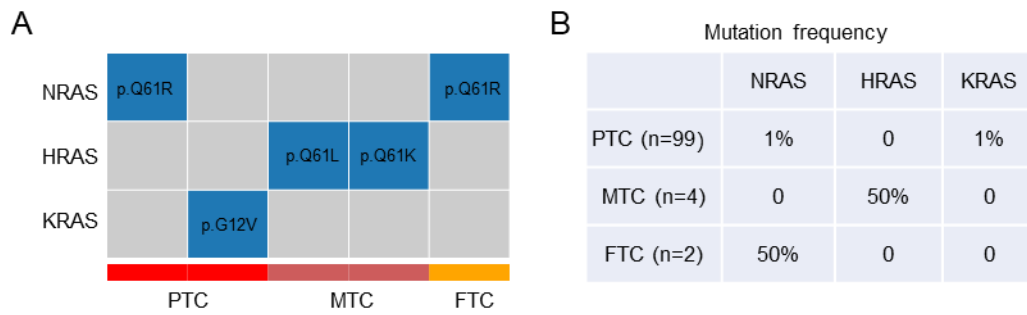

**Figure S1.** RAS mutation in thyroid cancers

(A) Amino acid changes of RAS in patients. (B) The mutation frequency of RAS in patients with different subtypes. PTC, Papillary thyroid carcinoma; FTC, Follicular thyroid carcinoma; MTC, Medullary thyroid carcinoma.

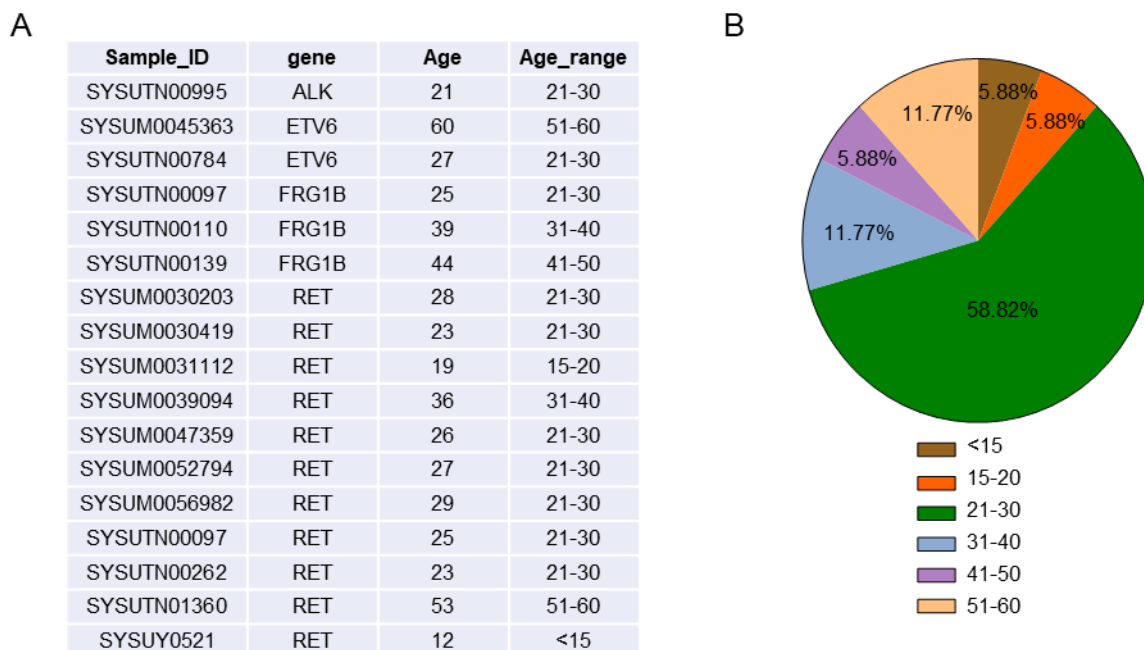

**Figure S2.** Distribution of gene fusion at different ages in PTC

(A) Gene fusion and age information in PTC patients. (B) The percentage of gene fusion among different age groups. PTC, Papillary thyroid carcinoma.

| Sample_ID    | Gene | Chr   | HGVSp                | Mutation Frequency |
|--------------|------|-------|----------------------|--------------------|
| SYSUM0033266 | BRAF | chr7  | NP_004324.2:p.V600E  | 17.63%             |
| SYSUM0033266 | RET  | chr10 | NP_066124.1:p.V939I  | 48.97%             |
| SYSUM0056983 | BRAF | chr7  | NP_004324.2:p.V600E  | 37.48%             |
| SYSUM0056983 | RET  | chr10 | NP_066124.1:p.S1021P | 52.24%             |

**Figure S3.** RET point mutation and BRAF mutation information in two PTC patients.

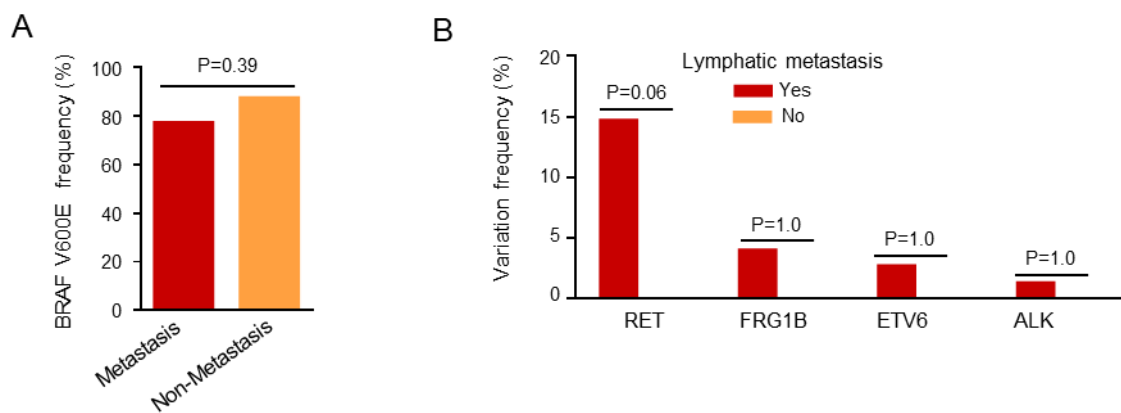

**Figure S4.** Gene variation frequency in PTC with lymphatic metastasis and lymphatic without metastasis

(A) The BRAF V600E mutation frequency in PTC with lymphatic metastasis and lymphatic without metastasis. (B) The gene fusion variation frequency in PTC with lymphatic metastasis and lymphatic without metastasis. PTC, Papillary thyroid carcinoma; ns, no significance.
