# Supplementary material for: Next-generation sequencing identified that RET variation associates with lymph node metastasis and the immune microenvironment in thyroid papillary carcinoma
Source: BMC Endocr Disord. 2024 May 11;24:68. doi: 10.1186/s12902-024-01586-5 (PMC11088169; doi:10.1186/s12902-024-01586-5)
Supplement: Supplementary file 2 — Supplementary Material 2. [file 12902_2024_1586_MOESM2_ESM.xlsx]

## Sheet: Genomic data
Sample_ID	Gene	Chr	Position_Start	Position_End	Reference	Mutation	HGVSc	HGVSp	Mutation_Type	Mutation_Frequency
SYSUM0027888	ATM	chr11	108186562	108186562	G	A	NM_000051.3:c.6019G>A	p.E2007K	missense_variant	0.1156
SYSUM0027888	BRAF	chr7	140453136	140453136	A	T	NM_004333.4:c.1799T>A	p.V600E	missense_variant	0.0918
SYSUM0027888	STK11	chr19	1219387	1219387	C	T	NM_000455.4:c.439C>T	p.R147C	missense_variant	0.4923
SYSUM0030203	POLE	chr12	133202759	133202759	G	A	NM_006231.3:c.6475C>T	p.R2159C	missense_variant	0.4823
SYSUM0030668	BRAF	chr7	140453136	140453136	A	T	NM_004333.4:c.1799T>A	p.V600E	missense_variant	0.1311
SYSUM0031112	FGFR1	chr8	38287364	38287364	T	C	NM_001174067.1:c.293A>G	p.N98S	missense_variant	0.4845
SYSUM0031112	POLE	chr12	133219288	133219288	C	T	NM_006231.3:c.4756G>A	p.A1586T	missense_variant	0.4695
SYSUM0031112	FBXW7	chr4	153249366	153249366	T	C	NM_033632.3:c.1412A>G	p.E471G	missense_variant	0.4954
SYSUM0031188	BRAF	chr7	140453136	140453136	A	T	NM_004333.4:c.1799T>A	p.V600E	missense_variant	0.2987
SYSUM0031188	TERT	chr5	1295228	1295228	G	A	NM_198253.2:c.-124C>T		upstream_gene_variant	0.3947
SYSUM0031188	ALK	chr2	29940517	29940519	AGG	-	NM_004304.4:c.712_714del	p.P238del	inframe_deletion	0.3924
SYSUM0033266	BRAF	chr7	140453136	140453136	A	T	NM_004333.4:c.1799T>A	p.V600E	missense_variant	0.1763
SYSUM0033266	RET	chr10	43619132	43619132	G	A	NM_020975.4:c.2815G>A	p.V939I	missense_variant	0.4897
SYSUM0033431	EGFR	chr7	55268974	55268974	G	A	NM_005228.4:c.3040G>A	p.D1014N	missense_variant	0.4691
SYSUM0033431	PPM1D	chr17	58677921	58677922	-	GCCTCCGCGGCCGTC	NM_003620.3:c.150_164dup	p.Pro51_Pro55dup	inframe_insertion	0.1863
SYSUM0033431	BRAF	chr7	140453136	140453136	A	T	NM_004333.4:c.1799T>A	p.V600E	missense_variant	0.1438
SYSUM0033466	BRAF	chr7	140453136	140453136	A	T	NM_004333.4:c.1799T>A	p.V600E	missense_variant	0.2167
SYSUM0033466	PMS2	chr7	6045547	6045547	G	C	NM_000535.6:c.139C>G	p.L47V	missense_variant	0.474
SYSUM0033578	ALK	chr2	29416743	29416743	G	C	NM_004304.4:c.4210C>G	p.L1404V	missense_variant	0.4626
SYSUM0033578	BRAF	chr7	140453136	140453136	A	T	NM_004333.4:c.1799T>A	p.V600E	missense_variant	0.2108
SYSUM0034189	BRAF	chr7	140453136	140453136	A	T	NM_004333.4:c.1799T>A	p.V600E	missense_variant	0.1274
SYSUM0034868	EPCAM	chr2	47606149	47606149	A	G	NM_002354.2:c.613A>G	p.N205D	missense_variant	0.4722
SYSUM0035205	BRAF	chr7	140453136	140453136	A	T	NM_004333.4:c.1799T>A	p.V600E	missense_variant	0.0909
SYSUM0036269	BRAF	chr7	140453136	140453136	A	T	NM_004333.4:c.1799T>A	p.V600E	missense_variant	0.2279
SYSUM0036470	TSHR	chr14	81610468	81610468	T	G	NM_000369.2:c.2066T>G	p.V689G	missense_variant	0.4953
SYSUM0036470	BRAF	chr7	140453136	140453136	A	T	NM_004333.4:c.1799T>A	p.V600E	missense_variant	0.2584
SYSUM0036841	TSHR	chr14	81557483	81557483	A	G	NM_000369.2:c.463A>G	p.I155V	missense_variant	0.5194
SYSUM0036841	PMS2	chr7	6038846	6038846	C	T	NM_000535.6:c.598G>A	p.V200I	missense_variant	0.4187
SYSUM0036841	BRAF	chr7	140453136	140453136	A	T	NM_004333.4:c.1799T>A	p.V600E	missense_variant	0.2276
SYSUM0036841	BRCA1	chr17	41246560	41246560	C	T	NM_007300.3:c.988G>A	p.D330N	missense_variant	0.4867
SYSUM0036841	APC	chr5	112151225	112151225	A	G	NM_000038.5:c.868A>G	p.S290G	missense_variant	0.4613
SYSUM0037066	BRAF	chr7	140453136	140453136	A	T	NM_004333.4:c.1799T>A	p.V600E	missense_variant	0.1218
SYSUM0037233	ERCC2	chr19	45855481	45855481	G	T	NM_000400.3:c.2176C>A	p.Q726K	missense_variant	0.4663
SYSUM0037233	BRAF	chr7	140453136	140453136	A	T	NM_004333.4:c.1799T>A	p.V600E	missense_variant	0.191
SYSUM0038409	MUTYH	chr1	45798130	45798130	G	A	NM_001128425.1:c.721C>T	p.R241W	missense_variant	0.5195
SYSUM0038409	POLE	chr12	133256793	133256793	T	C	NM_006231.3:c.301A>G	p.K101E	missense_variant	0.4861
SYSUM0038409	BRAF	chr7	140453136	140453136	A	T	NM_004333.4:c.1799T>A	p.V600E	missense_variant	0.3008
SYSUM0038409	STK11	chr19	1207030	1207030	C	T	NM_000455.4:c.118C>T	p.R40C	missense_variant	0.4684
SYSUM0039012	BRAF	chr7	140624404	140624409	CGGCGC	-	NM_004333.4:c.95_100del	p.Gly32_Ala33del	inframe_deletion	0.3178
SYSUM0039012	ALK	chr2	30143140	30143140	C	A	NM_004304.4:c.386G>T	p.G129V	missense_variant	0.4511
SYSUM0039012	BRAF	chr7	140453136	140453136	A	T	NM_004333.4:c.1799T>A	p.V600E	missense_variant	0.1667
SYSUM0039138	BRAF	chr7	140453136	140453136	A	T	NM_004333.4:c.1799T>A	p.V600E	missense_variant	0.0307
SYSUM0039706	PIK3CA	chr3	178952090	178952090	G	C	NM_006218.3:c.3145G>C	p.G1049R	missense_variant	0.1501
SYSUM0039706	BRAF	chr7	140453136	140453136	A	T	NM_004333.4:c.1799T>A	p.V600E	missense_variant	0.1612
SYSUM0039706	BRCA2	chr13	32914640	32914640	G	A	NM_000059.3:c.6148G>A	p.V2050I	missense_variant	0.5363
SYSUM0040009	BRAF	chr7	140453136	140453136	A	T	NM_004333.4:c.1799T>A	p.V600E	missense_variant	0.2743
SYSUM0040010	BRAF	chr7	140453136	140453136	A	T	NM_004333.4:c.1799T>A	p.V600E	missense_variant	0.2878
SYSUM0040010	DISP2	chr15	40657422	40657422	T	C	NM_033510.2:c.794T>C	p.M265T	missense_variant	0.4942
SYSUM0040299	BRAF	chr7	140453136	140453136	A	T	NM_004333.4:c.1799T>A	p.V600E	missense_variant	0.2218
SYSUM0040386	NTRK1	chr1	156844759	156844759	T	G	NM_002529.3:c.1313T>G	p.V438G	missense_variant	0.4848
SYSUM0040396	PIK3CA	chr3	178917595	178917595	A	G	NM_006218.3:c.470A>G	p.N157S	missense_variant	0.4955
SYSUM0040396	POLE	chr12	133257212	133257212	T	G	NM_006231.3:c.266A>C	p.D89A	missense_variant	0.4691
SYSUM0040396	BRAF	chr7	140453136	140453136	A	T	NM_004333.4:c.1799T>A	p.V600E	missense_variant	0.2852
SYSUM0040396	XRCC1	chr19	44050041	44050041	C	T	NM_006297.2:c.1550G>A	p.G517D	missense_variant	0.4344
SYSUM0041028	BRAF	chr7	140624404	140624409	CGGCGC	-	NM_004333.4:c.95_100del	p.Gly32_Ala33del	inframe_deletion	0.2675
SYSUM0041028	BRAF	chr7	140453136	140453136	A	T	NM_004333.4:c.1799T>A	p.V600E	missense_variant	0.2495
SYSUM0041826	BRAF	chr7	140453136	140453136	A	T	NM_004333.4:c.1799T>A	p.V600E	missense_variant	0.3021
SYSUM0041981	RELN	chr7	103137134	103137134	T	C	NM_173054.2:c.9032A>G	p.D3011G	missense_variant	0.4947
SYSUM0041981	BRAF	chr7	140453136	140453136	A	T	NM_004333.4:c.1799T>A	p.V600E	missense_variant	0.122
SYSUM0041981	CTNNB1	chr3	41266136	41266136	T	C	NM_001904.3:c.133T>C	p.S45P	missense_variant	0.0218
SYSUM0042736	HRAS	chr11	533874	533874	T	A	NM_001130442.2:c.182A>T	p.Q61L	missense_variant	0.4092
SYSUM0042736	ATM	chr11	108205756	108205756	C	T	NM_000051.3:c.8071C>T	p.R2691C	missense_variant	0.4509
SYSUM0042736	ATM	chr11	108126976	108126976	G	A	NM_000051.3:c.2159G>A	p.R720H	missense_variant	0.4452
SYSUM0045363	ATM	chr11	108190706	108190706	C	T	NM_000051.3:c.6373C>T	p.H2125Y	missense_variant	0.4863
SYSUM0045363	BRCA2	chr13	32972781	32972781	A	C	NM_000059.3:c.10131A>C	p.E3377D	missense_variant	0.5242
SYSUM0045363	MSH2	chr2	47635560	47635560	G	A	NM_000251.2:c.232G>A	p.V78I	missense_variant	0.4658
SYSUM0045363	ROS1	chr6	117631355	117631355	T	C	NM_002944.2:c.6323A>G	p.D2108G	missense_variant	0.494
SYSUM0045581	TSHR	chr14	81610674	81610674	G	A	NM_000369.2:c.2272G>A	p.E758K	missense_variant	0.4986
SYSUM0045581	BRAF	chr7	140453136	140453136	A	T	NM_004333.4:c.1799T>A	p.V600E	missense_variant	0.1228
SYSUM0045639	NTRK2	chr9	87342796	87342796	C	G	NM_006180.4:c.1081C>G	p.L361V	missense_variant	0.0912
SYSUM0045639	BRAF	chr7	140453136	140453136	A	T	NM_004333.4:c.1799T>A	p.V600E	missense_variant	0.1864
SYSUM0047138.1	AXIN1	chr16	396382	396382	G	A	NM_003502.3:c.644C>T	p.S215L	missense_variant	0.4833
SYSUM0047138.1	BRAF	chr7	140453136	140453136	A	T	NM_004333.4:c.1799T>A	p.V600E	missense_variant	0.0268
SYSUM0047896	RELN	chr7	103294573	103294573	T	C	NM_173054.2:c.1521A>G	p.I507M	missense_variant	0.4905
SYSUM0047896	BRAF	chr7	140453136	140453136	A	T	NM_004333.4:c.1799T>A	p.V600E	missense_variant	0.161
SYSUM0048221	SF3B1	chr2	198274610	198274610	G	A	NM_012433.3:c.788C>T	p.A263V	missense_variant	0.4859
SYSUM0048221	BRAF	chr7	140453136	140453136	A	T	NM_004333.4:c.1799T>A	p.V600E	missense_variant	0.083
SYSUM0048726	BRAF	chr7	140453136	140453136	A	T	NM_004333.4:c.1799T>A	p.V600E	missense_variant	0.0309
SYSUM0048726	PPM1D	chr17	58740749	58740749	C	T	NM_003620.3:c.1654C>T	p.R552Ter	stop_gained	0.079
SYSUM0048726	NRG3	chr10	84744888	84744888	A	G	NM_001010848.3:c.1618A>G	p.T540A	missense_variant	0.497
SYSUM0050326	BRAF	chr7	140453136	140453136	A	T	NM_004333.4:c.1799T>A	p.V600E	missense_variant	0.0181
SYSUM0052794	DISP2	chr15	40660805	40660805	G	T	NM_033510.2:c.2492G>T	p.G831V	missense_variant	0.4633
SYSUM0053941	BRAF	chr7	140453136	140453136	A	T	NM_004333.4:c.1799T>A	p.V600E	missense_variant	0.2027
SYSUM0053941	BRCA1	chr17	41201193	41201193	A	T	NM_007300.3:c.5414T>A	p.V1805E	missense_variant	0.1541
SYSUM0054683	BRAF	chr7	140453136	140453136	A	T	NM_004333.4:c.1799T>A	p.V600E	missense_variant	0.3165
SYSUM0054683	CPAMD8	chr19	17137568	17137568	C	T	NM_015692.2:c.26G>A	p.G9D	missense_variant	0.0926
SYSUM0054683	ERCC2	chr19	45860740	45860742	TGA	-	NM_000400.3:c.1367_1369del	p.I456del	inframe_deletion	0.4237
SYSUM0056274	BRAF	chr7	140453136	140453136	A	T	NM_004333.4:c.1799T>A	p.V600E	missense_variant	0.1114
SYSUM0056274	RBM10	chrX	47030532	47030532	C	T	NM_001204468.1:c.502C>T	p.R168W	missense_variant	0.4756
SYSUM0056635	EGFR	chr7	55240794	55240794	C	T	NM_005228.4:c.2038C>T	p.R680W	missense_variant	0.4591
SYSUM0056635	BRAF	chr7	140453136	140453136	A	T	NM_004333.4:c.1799T>A	p.V600E	missense_variant	0.074
SYSUM0056635	TERT	chr5	1272311	1272311	C	T	NM_198253.2:c.2371G>A	p.V791I	missense_variant	0.058
SYSUM0056919	BRAF	chr7	140453136	140453136	A	T	NM_004333.4:c.1799T>A	p.V600E	missense_variant	0.1104
SYSUM0056982	BRCA1	chr17	41245161	41245161	G	A	NM_007300.3:c.2387C>T	p.T796I	missense_variant	0.4709
SYSUM0056983	MSH6	chr2	48027812	48027812	A	G	NM_000179.2:c.2690A>G	p.N897S	missense_variant	0.4862
SYSUM0056983	BRAF	chr7	140453136	140453136	A	T	NM_004333.4:c.1799T>A	p.V600E	missense_variant	0.3748
SYSUM0056983	RET	chr10	43622044	43622044	T	C	NM_020975.4:c.3061T>C	p.S1021P	missense_variant	0.5224
SYSUM0026569	BRAF	chr7	140453136	140453136	A	T	NM_004333.4:c.1799T>A	p.V600E	missense_variant	0.0912
SYSUM0034188	RELN	chr7	103216037	103216037	C	A	NM_173054.2:c.4261G>T	p.D1421Y	missense_variant	0.437
SYSUM0034188	RELN	chr7	103292195	103292195	G	A	NM_173054.2:c.1805C>T	p.S602F	missense_variant	0.4804
SYSUM0034188	BRCA2	chr13	32944563	32944563	G	A	NM_000059.3:c.8356G>A	p.A2786T	missense_variant	0.4514
SYSUM0034188	BRAF	chr7	140453136	140453136	A	T	NM_004333.4:c.1799T>A	p.V600E	missense_variant	0.2662
SYSUM0038779	STK11	chr19	1223125	1223125	C	G	NM_000455.4:c.1062C>G	p.F354L	missense_variant	0.4693
SYSUM0038779	RET	chr10	43617416	43617416	T	C	NM_020975.4:c.2753T>C	p.M918T	missense_variant	0.4214
SYSUM0038779	XRCC1	chr19	44048313	44048313	G	T	NM_006297.2:c.1695C>A	p.Y565Ter	stop_gained	0.1432
SYSUM0038821	RET	chr10	43609936	43609936	T	C	NM_020975.4:c.1888T>C	p.C630R	missense_variant	0.2811
SYSUM0046410	RELN	chr7	103629739	103629739	C	T	NM_173054.2:c.65G>A	p.R22K	missense_variant	0.4717
SYSUM0046410	IDH1	chr2	209104679	209104679	C	T	NM_005896.3:c.899G>A	p.G300D	missense_variant	0.4991
SYSUM0046410	BRAF	chr7	140453136	140453136	A	T	NM_004333.4:c.1799T>A	p.V600E	missense_variant	0.3814
SYSUM0047359	ATM	chr11	108170498	108170498	T	C	NM_000051.3:c.5063T>C	p.I1688T	missense_variant	0.483
SYSUM0047359	CPAMD8	chr19	17013546	17013546	C	A	NM_015692.2:c.4739G>T	p.R1580L	missense_variant	0.5538
SYSUM0053588	BRAF	chr7	140453136	140453136	A	T	NM_004333.4:c.1799T>A	p.V600E	missense_variant	0.4528
SYSUM0053588	CDH1	chr16	68867382	68867382	G	A	NM_004360.4:c.2629G>A	p.G877R	missense_variant	0.4714
SYSUM0053588	FGFR1	chr8	38271189	38271189	C	T	NM_001174067.1:c.2519G>A	p.R840Q	missense_variant	0.475
SYSUM0055699	TERT	chr5	1295169	1295169	G	C	NM_198253.2:c.-65C>G		upstream_gene_variant	0.3776
SYSUM0055699	PIK3CA	chr3	178936082	178936082	G	A	NM_006218.3:c.1624G>A	p.E542K	missense_variant	0.0112
SYSUM0055699	TERT	chr5	1295168	1295168	C	T	NM_198253.2:c.-64G>A		upstream_gene_variant	0.3678
SYSUM0055973	BRAF	chr7	140453136	140453136	A	T	NM_004333.4:c.1799T>A	p.V600E	missense_variant	0.2318
SYSUM0055973	DOCK9	chr13	99540654	99540654	G	A	NM_015296.2:c.1940C>T	p.P647L	missense_variant	0.4931
SYSUM0055973	XRCC1	chr19	44050023	44050023	G	A	NM_006297.2:c.1568C>T	p.T523M	missense_variant	0.5156
SYSUM0055973	APC	chr5	112179703	112179703	G	T	NM_000038.5:c.8412G>T	p.Q2804H	missense_variant	0.4781
SYSUM0051205	ERBB2	chr17	37865700	37865700	G	A	NM_004448.3:c.569G>A	p.R190Q	missense_variant	0.5204
SYSUM0051205	BRAF	chr7	140453136	140453136	A	T	NM_004333.4:c.1799T>A	p.V600E	missense_variant	0.2305
SYSUM0051205	NF2	chr22	30000085	30000085	T	A	NM_000268.3:c.98T>A	p.M33K	missense_variant	0.5023
SYSUM0026061	BRAF	chr7	140453136	140453136	A	T	NM_004333.4:c.1799T>A	p.V600E	missense_variant	0.3124
SYSUM0028401	BRAF	chr7	140453136	140453136	A	T	NM_004333.4:c.1799T>A	p.V600E	missense_variant	0.3323
SYSUM0028963	BRAF	chr7	140453136	140453136	A	T	NM_004333.4:c.1799T>A	p.V600E	missense_variant	0.202
SYSUM0029769	HRAS	chr11	533875	533875	G	T	NM_001130442.2:c.181C>A	p.Q61K	missense_variant	0.1688
SYSUM0030419	NF1	chr17	29663420	29663420	A	G	NM_001042492.2:c.6076A>G	p.I2026V	missense_variant	0.4725
SYSUM0031130	BRAF	chr7	140453136	140453136	A	T	NM_004333.4:c.1799T>A	p.V600E	missense_variant	0.0663
SYSUM0031130	APC	chr5	112174779	112174779	G	T	NM_000038.5:c.3488G>T	p.S1163I	missense_variant	0.4854
SYSUM0031902	BRAF	chr7	140453136	140453136	A	T	NM_004333.4:c.1799T>A	p.V600E	missense_variant	0.094
SYSUM0032326	CPAMD8	chr19	17104353	17104353	G	A	NM_015692.2:c.1280C>T	p.T427M	missense_variant	0.5015
SYSUM0032326	RELN	chr7	103338407	103338407	C	T	NM_173054.2:c.1036G>A	p.D346N	missense_variant	0.1771
SYSUM0032326	BRAF	chr7	140453136	140453136	A	T	NM_004333.4:c.1799T>A	p.V600E	missense_variant	0.3146
SYSUM0032326	DISP2	chr15	40660505	40660505	C	A	NM_033510.2:c.2192C>A	p.T731K	missense_variant	0.4843
SYSUM0032334	BRAF	chr7	140453136	140453136	A	T	NM_004333.4:c.1799T>A	p.V600E	missense_variant	0.27
SYSUM0033098	BRAF	chr7	140453136	140453136	A	T	NM_004333.4:c.1799T>A	p.V600E	missense_variant	0.12
SYSUM0035065	BRAF	chr7	140453136	140453136	A	T	NM_004333.4:c.1799T>A	p.V600E	missense_variant	0.304
SYSUM0035065	PMS2	chr7	6026810	6026810	G	A	NM_000535.6:c.1586C>T	p.S529L	missense_variant	0.468
SYSUM0036151	BRCA1	chr17	41251893	41251893	T	G	NM_007300.3:c.446A>C	p.E149A	missense_variant	0.4337
SYSUM0036151	BRAF	chr7	140453136	140453136	A	T	NM_004333.4:c.1799T>A	p.V600E	missense_variant	0.1619
SYSUM0036151	KIT	chr4	55524243	55524243	A	G	NM_000222.2:c.62A>G	p.Q21R	missense_variant	0.4709
SYSUM0038872	TP53	chr17	7577535	7577535	C	G	NM_000546.5:c.746G>C	p.R249T	missense_variant	0.4979
SYSUM0038872	MSH6	chr2	48026768	48026768	C	T	NM_000179.2:c.1646C>T	p.S549F	missense_variant	0.1894
SYSUM0038872	POLE	chr12	133244968	133244968	G	A	NM_006231.3:c.2147C>T	p.A716V	missense_variant	0.614
SYSUM0043915	RELN	chr7	103191737	103191737	C	T	NM_173054.2:c.6079G>A	p.V2027I	missense_variant	0.4819
SYSUM0043915	BRCA1	chr17	41245161	41245161	G	A	NM_007300.3:c.2387C>T	p.T796I	missense_variant	0.4854
SYSUM0043915	BRCA2	chr13	32914141	32914141	A	C	NM_000059.3:c.5649A>C	p.K1883N	missense_variant	0.5
SYSUM0043915	BRAF	chr7	140453136	140453136	A	T	NM_004333.4:c.1799T>A	p.V600E	missense_variant	0.2375
SYSUM0047056	BRAF	chr7	140453136	140453136	A	T	NM_004333.4:c.1799T>A	p.V600E	missense_variant	0.2274
SYSUM0050713	ROS1	chr6	117674318	117674318	C	G	NM_002944.2:c.4156G>C	p.V1386L	missense_variant	0.0861
SYSUM0050713	RB1	chr13	48954350	48954350	C	T	NM_000321.2:c.1471C>T	p.L491F	missense_variant	0.432
SYSUM0050713	APC	chr5	112128212	112128212	G	C	NM_000038.5:c.715G>C	p.A239P	missense_variant	0.0505
SYSUM0050713	BRAF	chr7	140453136	140453136	A	T	NM_004333.4:c.1799T>A	p.V600E	missense_variant	0.0464
SYSUM0051073	BRAF	chr7	140453136	140453136	A	T	NM_004333.4:c.1799T>A	p.V600E	missense_variant	0.3111
SYSUM0051073	CYP2D6	chr22	42525182	42525182	A	T	NM_000106.5:c.358T>A	p.F120I	missense_variant	0.5179
SYSUM0051111	DOCK9	chr13	99449488	99449488	C	T	NM_015296.2:c.6082G>A	p.G2028S	missense_variant	0.466
SYSUM0051352	BRAF	chr7	140453136	140453136	A	T	NM_004333.4:c.1799T>A	p.V600E	missense_variant	0.2228
SYSUM0051352	TP53	chr17	7577085	7577085	C	T	NM_000546.5:c.853G>A	p.E285K	missense_variant	0.044
SYSUM0053707	EGFR	chr7	55266549	55266549	G	A	NM_005228.4:c.2841G>A	p.M947I	missense_variant	0.4862
SYSUM0053707	BRAF	chr7	140453136	140453136	A	T	NM_004333.4:c.1799T>A	p.V600E	missense_variant	0.2352
SYSUM0053707	ROS1	chr6	117677824	117677824	C	T	NM_002944.2:c.4109G>A	p.C1370Y	missense_variant	0.501
SYSUM0056754	BRAF	chr7	140453136	140453136	A	T	NM_004333.4:c.1799T>A	p.V600E	missense_variant	0.3535
SYSUM0056991	NRAS	chr1	115256529	115256529	T	C	NM_002524.4:c.182A>G	p.Q61R	missense_variant	0.3772
SYSUM0056991	TIRAP	chr11	126160851	126160851	T	A	NM_148910.2:c.62T>A	p.M21K	missense_variant	0.4815
SYSUM0027360	BRAF	chr7	140453136	140453136	A	T	NM_004333.4:c.1799T>A	p.V600E	missense_variant	0.0211
SYSUTN00088	BRAF	chr7	140453136	140453136	A	T	NM_004333.4:c.1799T>A	p.V600E	missense_variant	0.2676
SYSUTN00088	POLE	chr12	133218333	133218333	C	T	NM_006231.3:c.5278G>A	p.V1760M	missense_variant	0.5
SYSUTN00097	RET	chr10	43613902	43613902	A	C	NM_020975.4:c.2366A>C	p.K789T	missense_variant	0.2416
SYSUTN00097	RET	chr10	43617439	43617439	C	T	NM_020975.4:c.2776C>T	p.H926Y	missense_variant	0.2695
SYSUTN00110	BRAF	chr7	140453136	140453136	A	T	NM_004333.4:c.1799T>A	p.V600E	missense_variant	0.2621
SYSUTN00115	APC	chr5	112175531	112175531	G	A	NM_000038.5:c.4240G>A	p.V1414I	missense_variant	0.4839
SYSUTN00139	BRAF	chr7	140453136	140453136	A	T	NM_004333.4:c.1799T>A	p.V600E	missense_variant	0.2518
SYSUTN00139	MLH1	chr3	37067407	37067407	G	A	NM_000249.3:c.1318G>A	p.V440M	missense_variant	0.4403
SYSUTN00188	BRAF	chr7	140453136	140453136	A	T	NM_004333.4:c.1799T>A	p.V600E	missense_variant	0.2154
SYSUTN00251	BRAF	chr7	140453136	140453136	A	T	NM_004333.4:c.1799T>A	p.V600E	missense_variant	0.1149
SYSUTN00251	PIK3CA	chr3	178952085	178952085	A	G	NM_006218.3:c.3140A>G	p.H1047R	missense_variant	0.0648
SYSUTN00257	BRAF	chr7	140453136	140453136	A	T	NM_004333.4:c.1799T>A	p.V600E	missense_variant	0.0423
SYSUTN00262	RB1	chr13	48934188	48934188	T	C	NM_000321.2:c.643T>C	p.S215P	missense_variant	0.4866
SYSUTN00295	JAK2	chr9	5080274	5080274	A	C	NM_004972.3:c.2177A>C	p.N726T	missense_variant	0.5123
SYSUTN00295	BRAF	chr7	140453136	140453136	A	T	NM_004333.4:c.1799T>A	p.V600E	missense_variant	0.1901
SYSUM0056513	DISP2	chr15	40661161	40661161	C	G	NM_033510.2:c.2848C>G	p.R950G	missense_variant	0.4811
SYSUM0056513	BRAF	chr7	140453136	140453136	A	T	NM_004333.4:c.1799T>A	p.V600E	missense_variant	0.0682
SYSUM0056513	POLE	chr12	133219313	133219313	C	G	NM_006231.3:c.4731G>C	p.E1577D	missense_variant,splice_region_variant	0.4876
SYSUM0056513	CHEK2	chr22	29085140	29085140	G	A	NM_001005735.1:c.1654C>T	p.P552S	missense_variant	0.067
SYSUM0056540	BRAF	chr7	140453136	140453136	A	T	NM_004333.4:c.1799T>A	p.V600E	missense_variant	0.1479
SYSUM0056992	BRAF	chr7	140624427	140624427	T	G	NM_004333.4:c.77A>C	p.E26A	missense_variant	0.1571
SYSUM0056992	BRAF	chr7	140453136	140453136	A	T	NM_004333.4:c.1799T>A	p.V600E	missense_variant	0.1985
SYSUM0056992	AXIN1	chr16	338166	338166	C	T	NM_003502.3:c.2545G>A	p.V849I	missense_variant	0.4666
SYSUM0057017	BRAF	chr7	140453136	140453136	A	T	NM_004333.4:c.1799T>A	p.V600E	missense_variant	0.241
SYSUTN00404	PPM1D	chr17	58677959	58677959	G	-	NM_003620.3:c.184del	p.Glu62LysfsTer103	frameshift_variant	0.468
SYSUTN00404	TP53	chr17	7577120	7577120	C	T	NM_000546.5:c.818G>A	p.R273H	missense_variant	0.2014
SYSUTN00404	NRAS	chr1	115256529	115256529	T	C	NM_002524.4:c.182A>G	p.Q61R	missense_variant	0.4442
SYSUTN00404	MLH1	chr3	37067242	37067242	C	T	NM_000249.3:c.1153C>T	p.R385C	missense_variant	0.4562
SYSUTN00441	BRAF	chr7	140453136	140453136	A	T	NM_004333.4:c.1799T>A	p.V600E	missense_variant	0.3458
SYSUTN00599	BRAF	chr7	140453136	140453136	A	T	NM_004333.4:c.1799T>A	p.V600E	missense_variant	0.2848
SYSUTN00913	BRAF	chr7	140453136	140453136	A	T	NM_004333.4:c.1799T>A	p.V600E	missense_variant	0.2102
SYSUTN00913	ATM	chr11	108170498	108170498	T	C	NM_000051.3:c.5063T>C	p.I1688T	missense_variant	0.5066
SYSUTN00913	KDM6B	chr17	7750460	7750460	C	T	NM_001080424.1:c.947C>T	p.P316L	missense_variant	0.4936
SYSUTN01037	BRAF	chr7	140453136	140453136	A	T	NM_004333.4:c.1799T>A	p.V600E	missense_variant	0.22
SYSUTN01037	DOCK9	chr13	99554118	99554118	A	G	NM_015296.2:c.1420T>C	p.F474L	missense_variant	0.4871
SYSUTN01044	BRAF	chr7	140453136	140453136	A	T	NM_004333.4:c.1799T>A	p.V600E	missense_variant	0.2399
SYSUTN01044	CDKN2C	chr1	51436170	51436170	G	T	NM_078626.2:c.129+1G>T		splice_donor_variant	0.236
SYSUTN00568	BRAF	chr7	140453136	140453136	A	T	NM_004333.4:c.1799T>A	p.V600E	missense_variant	0.2086
SYSUTN00568	CHEK2	chr22	29107934	29107934	C	T	NM_001005735.1:c.884G>A	p.S295N	missense_variant	0.5091
SYSUTN00568	ATM	chr11	108155048	108155048	A	C	NM_000051.3:c.3841A>C	p.S1281R	missense_variant	0.4643
SYSUTN00767	BRAF	chr7	140453136	140453136	A	T	NM_004333.4:c.1799T>A	p.V600E	missense_variant	0.135
SYSUTN00840	ALK	chr2	29416431	29416431	C	T	NM_004304.4:c.4522G>A	p.G1508S	missense_variant	0.5111
SYSUTN00840	KRAS	chr12	25398284	25398284	C	A	NM_033360.3:c.35G>T	p.G12V	missense_variant	0.219
SYSUTN00882	BRAF	chr7	140453136	140453136	A	T	NM_004333.4:c.1799T>A	p.V600E	missense_variant	0.1538
SYSUTN00882	POLE	chr12	133235891	133235892	-	G	NM_006231.3:c.3264_3265insC	p.Val1089ArgfsTer35	frameshift_variant	0.436
SYSUTN00995	BRCA1	chr17	41231414	41231414	A	C	NM_007300.3:c.4360T>G	p.S1454A	missense_variant,splice_region_variant	0.4686
SYSUTN01360	PMS2	chr7	6026933	6026933	G	A	NM_000535.6:c.1463C>T	p.A488V	missense_variant	0.4944
SYSUTN01360	DICER1	chr14	95562923	95562923	T	C	NM_030621.4:c.4334A>G	p.Y1445C	missense_variant	0.2293
SYSUTN01360	MDC1	chr6	30673682	30673682	G	A	NM_014641.2:c.3278C>T	p.P1093L	missense_variant	0.5007

## Sheet: Gene fusion
SampleName	Gene1	Gene2	Function1	Function2	Break1	Break2	Frequency
SYSUM0030203	TRIM24	RET	intron10	intron11	chr7:138254780	chr10:43611055	0.1069
SYSUM0031112	RET	GOLGA5	intron11	intron7	chr10:43610537	chr14:93283195	0.1145
SYSUM0045363	ETV6	NTRK3	intron4	intron13	chr12:12011682	chr15:88597233	0.1914
SYSUM0045363	NTRK3	ETV6	intron13	intron4	chr15:88597182	chr12:12011685	0.1693
SYSUM0052794	RET	TIMM23	intron11	NA	chr10:43610412	chr10:51663180	0.4052
SYSUM0052794	PARG	RET	intron6	intron11	chr10:51109796	chr10:43610412	0.4052
SYSUM0052794	PARG	RET	intron3	intron11	chr10:51331565	chr10:43610412	0.4052
SYSUM0052794	RET	TIMM23	intron11	intron2	chr10:43610414	chr10:51617984	0.1845
SYSUM0052794	TIMM23B	RET	intron2	intron11	chr10:51376768	chr10:43610414	0.1845
SYSUM0056982	CCDC6	RET	intron1	intron10	chr10:61627327	chr10:43609220	0.0414
SYSUM0047359	CCDC6	RET	intron1	intron11	chr10:61658450	chr10:43611633	0.2614
SYSUM0047359	RET	ADARB2	intron11	intron8	chr10:43611683	chr10:1241626	0.2012
SYSUM0030419	CCDC6	RET	intron1	intron11	chr10:61624508	chr10:43610195	0.2956
SYSUM0030419	RET	NRBF2	intron11	NA	chr10:43610201	chr10:64883557	0.2176
SYSUM0039094	RET	CCDC6	intron11	intron1	chr10:43610779	chr10:61646649	0.1764
SYSUM0039094	CCDC6	RET	intron1	intron11	chr10:61646652	chr10:43610788	0.1457
SYSUY0521	RET	CCDC6	intron11	intron1	chr10:43611288	chr10:61623941	0.2377
SYSUY0521	CCDC6	RET	intron1	intron11	chr10:61623914	chr10:43611322	0.1682
SYSUTN00784	ETV6	NTRK3	intron4	intron13	chr12:12014193	chr15:88593034	0.3733
SYSUTN00784	NTRK3	ETV6	intron13	intron4	chr15:88593032	chr12:12014171	0.2805
SYSUTN00995	ALK	STRN	intron19	intron3	chr2:29446603	chr2:37140633	0.1867
SYSUTN00097	FRG1B	RNF130	NA	intron7	chr20:29627991	chr5:179384876	0.0806
SYSUTN00097	CCDC6	RET	intron1	intron11	chr10:61621781	chr10:43611645	0.1826
SYSUTN00110	FRG1B	RNF130	NA	intron7	chr20:29627991	chr5:179384876	0.0648
SYSUTN00110	LRP1B	FRG1B	intron3	NA	chr2:142179118	chr20:29627993	0.0648
SYSUTN00139	FRG1B	RNF130	NA	intron7	chr20:29627991	chr5:179384876	0.0969
SYSUTN00262	RET	ZNF22	exon7	NA	chr10:43606887	chr10:45627322	0.4014
SYSUTN00262	PPP1R21	RET	intron9	intron11	chr2:48697616	chr10:43611106	0.3022
SYSUTN01360	RET	CCDC6	intron11	intron1	chr10:43611961	chr10:61634661	0.5373
SYSUTN01360	CCDC6	RET	intron1	intron11	chr10:61634661	chr10:43611961	0.7143

## Sheet: Clinical data 
Sample_ID	Sex	Age	Histological_type	Primar_tumor_site	Lmph_node_examined_count	Positive_lmphatic_count	Lmphatic_metastasis	Pathologic_T	pathologic_N	Pathologic_M	Pathologic _stage
SYSUM0031902	Female	25	PTC	right	4	0	No	T1a	N0	M0	I
SYSUM0050713	Female	32	PTC	left	9	0	No	T1a	N0	M0	I
SYSUM0033098	Female	34	PTC	left	8	0	No	T1a	N0	M0	I
SYSUM0036151	Male	34	PTC	left	0	0	No	T1a	N0	M0	I
SYSUM0026061	Female	35	PTC	bilateral	9	0	No	T1a	N0	M0	I
SYSUM0037066	Female	41	PTC	right	2	0	No	T1a	N0	M0	I
SYSUM0056540	Female	41	PTC	left	4	0	No	T1a	N0	M0	I
SYSUM0040299	Male	43	PTC	bilateral	0	0	No	T1a	N0	M0	I
SYSUM0053707	Male	44	PTC	left	4	0	No	T1a	N0	M0	I
SYSUM0042736	Male	47	MTC	bilateral	24	0	No	T1a	N0	M0	I
SYSUM0047138.1	Male	48	PTC	bilateral	4	0	No	T1a	N0	M0	I
SYSUM0050326	Female	48	PTC	bilateral	22	0	No	T1a	N0	M0	I
SYSUM0055973	Female	50	PTC	bilateral	7	0	No	T1a	N0	M0	I
SYSUTN00568	Female	52	PTC	left	4	0	No	T1a	N0	M0	I
SYSUM0051073	Female	54	PTC	right	4	0	No	T1a	N0	M0	I
SYSUM0031130	Male	55	PTC	right	7	0	No	T1a	N0	M0	I
SYSUM0040386	Female	59	PTC	left	4	0	No	T1a	N0	M0	I
SYSUM0051205	Female	62	PTC	right	10	0	No	T1a	N0	M0	I
SYSUM0038821	Male	33	MTC	left	16	0	No	T1b	N0	M0	I
SYSUM0041826	Male	38	PTC	left	8	0	No	T1b	N0	M0	I
SYSUM0051352	Male	40	PTC	right	0	0	No	T1b	N0	M0	I
SYSUTN00913	Female	46	PTC	bilateral	4	0	No	T1b	N0	M0	I
SYSUTN00188	Male	55	FTC	left	5	0	No	T1b	N0	M0	I
SYSUM0036841	Female	56	PTC	right	0	0	No	T1b	N0	M0	I
SYSUTN00840	Female	66	PTC	right	8	0	No	T1b	N0	M0	I
SYSUM0038872	Female	26	ATC	left	0	0	No	T2	N0	M0	I
SYSUM0055699	Female	68	NA	isthmus	0	0	No	T2	N0	M0	NA
SYSUM0056513	Female	51	PTC	bilateral	12	0	No	T3b	N0	M0	I
SYSUTN00404	Male	62	FTC	left	38	0	No	T3b	N0	M0	II
SYSUM0056991	Male	59	PTC	NA	0	0	No	T4a	N0	M0	NA
SYSUM0036269	Female	20	PTC	bilateral	1	1	Yes	T1a	N1a	M0	I
SYSUTN00995	Male	21	PTC	left	15	2	Yes	T1a	N1a	M0	I
SYSUM0057017	Male	27	PTC	left	5	3	Yes	T1a	N1a	M0	I
SYSUM0036470	Female	29	PTC	left	1	1	Yes	T1a	N1a	M0	I
SYSUM0056274	Female	29	PTC	right	3	3	Yes	T1a	N1a	M0	I
SYSUM0056992	Male	30	PTC	left	5	1	Yes	T1a	N1a	M0	I
SYSUM0047056	Female	31	PTC	bilateral	21	3	Yes	T1a	N1a	M0	I
SYSUTN01044	Male	33	PTC	left	1	1	Yes	T1a	N1a	M0	I
SYSUM0032334	Female	34	PTC	bilateral	7	3	Yes	T1a	N1a	M0	I
SYSUM0039706	Male	34	PTC	left	3	3	Yes	T1a	N1a	M0	I
SYSUM0047896	Male	34	PTC	right	5	4	Yes	T1a	N1a	M0	I
SYSUM0048726	Male	39	PTC	left	8	2	Yes	T1a	N1a	M0	I
SYSUM0056919	Male	39	PTC	right	13	12	Yes	T1a	N1a	M0	I
SYSUM0028963	Female	40	PTC	right	5	3	Yes	T1a	N1a	M0	I
SYSUTN00295	Male	40	PTC	right	7	1	Yes	T1a	N1a	M0	I
SYSUM0034188	Female	43	PTC	left	6	3	Yes	T1a	N1a	M0	I
SYSUM0035205	Female	44	PTC	right	8	4	Yes	T1a	N1a	M0	I
SYSUM0039012	Female	46	PTC	right	3	1	Yes	T1a	N1a	M0	I
SYSUTN00767	Female	46	PTC	right	6	3	Yes	T1a	N1a	M0	I
SYSUM0026569	Male	49	PTC	bilateral	5	1	Yes	T1a	N1a	M0	I
SYSUM0041028	Female	50	PTC	right	3	1	Yes	T1a	N1a	M0	I
SYSUM0045639	Female	52	PTC	right	7	2	Yes	T1a	N1a	M0	I
SYSUTN00251	Female	63	PTC	NA	7	5	Yes	T1a	N1a	M0	II
SYSUM0029769	Male	47	MTC	left	30	2	Yes	T1a	N1a	M0	III
SYSUM0047359	Female	26	PTC	left	3	1	Yes	T1b	N1a	M0	I
SYSUTN00784	Male	27	PTC	bilateral	10	10	Yes	T1b	N1a	M0	I
SYSUM0035065	Female	28	PTC	right	8	4	Yes	T1b	N1a	M0	I
SYSUM0053941	Male	30	PTC	bilateral	16	6	Yes	T1b	N1a	M0	I
SYSUTN00882	Male	34	PTC	right	12	3	Yes	T1b	N1a	M0	I
SYSUM0043915	Female	38	PTC	right	4	2	Yes	T1b	N1a	M0	I
SYSUTN00110	Male	39	PTC	bilateral	10	1	Yes	T1b	N1a	M0	I
SYSUM0054683	Female	40	PTC	left	16	5	Yes	T1b	N1a	M0	I
SYSUM0028401	Male	43	PTC	left	5	5	Yes	T1b	N1a	M0	I
SYSUM0038409	Female	45	PTC	right	9	2	Yes	T1b	N1a	M0	I
SYSUM0045581	Female	45	PTC	bilateral	14	6	Yes	T1b	N1a	M0	I
SYSUM0033431	Female	49	PTC	bilateral	7	1	Yes	T1b	N1a	M0	I
SYSUTN01360	Female	53	PTC	right	4	1	Yes	T1b	N1a	M0	I
SYSUM0033466	Female	55	PTC	left	18	1	Yes	T1b	N1a	M0	II
SYSUM0033266	Female	60	PTC	right	5	3	Yes	T1b	N1a	M0	II
SYSUM0034189	Female	34	PTC	right	7	5	Yes	T2	N1a	M0	I
SYSUM0046410	Male	34	PTC	left	4	1	Yes	T2	N1a	M0	I
SYSUM0040010	Male	36	PTC	bilateral	17	6	Yes	T2	N1a	M0	I
SYSUM0040009	Male	38	PTC	right	18	14	Yes	T2	N1a	M0	I
SYSUTN00441	Female	43	PTC	bilateral	8	2	Yes	T2	N1a	M0	I
SYSUM0056983	Male	50	PTC	bilateral	7	6	Yes	T2	N1a	M0	I
SYSUM0053588	Male	57	PTC	left	1	1	Yes	T2	N1a	M0	II
SYSUM0030203	Female	28	PTC	bilateral	99	22	Yes	T1a	N1b	M0	I
SYSUTN00139	Female	44	PTC	bilateral	42	5	Yes	T1a	N1b	M0	I
SYSUM0038779	Female	24	MTC	bilateral	84	54	Yes	T1b	N1b	M0	Ⅳ
SYSUM0032326	Male	24	PTC	right	74	12	Yes	T1b	N1b	M0	I
SYSUTN00097	Male	25	PTC	right	41	13	Yes	T1b	N1b	M0	I
SYSUM0052794	Male	27	PTC	bilateral	66	17	Yes	T1b	N1b	M0	I
SYSUM0048221	Female	29	PTC	right	48	8	Yes	T1b	N1b	M0	I
SYSUM0056754	Female	31	PTC	right	24	4	Yes	T1b	N1b	M0	I
SYSUTN01037	Female	32	PTC	bilateral	24	5	Yes	T1b	N1b	M0	I
SYSUM0040396	Female	35	PTC	right	41	3	Yes	T1b	N1b	M0	I
SYSUM0039094	Female	36	PTC	right	60	7	Yes	T1b	N1b	M0	I
SYSUM0039138	Female	38	PTC	left	32	1	Yes	T1b	N1b	M0	I
SYSUM0041981	Female	39	PTC	left	38	7	Yes	T1b	N1b	M0	I
SYSUM0031188	Male	59	PTC	bilateral	82	7	Yes	T1b	N1b	M0	II
SYSUM0037233	Male	38	PTC	bilateral	39	14	Yes	T2	N1b	M0	I
SYSUM0030668	Female	55	PTC	bilateral	34	13	Yes	T2	N1b	M0	II
SYSUM0027888	Female	61	PTC	right	25	8	Yes	T2	N1b	M0	II
SYSUM0031112	Male	19	PTC	bilateral	40	20	Yes	T3a	N1b	M0	I
SYSUM0034868	Female	21	PTC	right	59	22	Yes	T3a	N1b	M0	I
SYSUM0030419	Female	23	PTC	left	30	17	Yes	T3a	N1b	M0	I
SYSUTN00262	Female	23	PTC	bilateral	47	15	Yes	T3a	N1b	M0	I
SYSUM0056982	Female	29	PTC	left	45	21	Yes	T3a	N1b	M0	I
SYSUM0045363	Male	60	PTC	right	39	7	Yes	T3a	N1b	M0	II
SYSUM0033578	Male	68	PTC	bilateral	27	18	Yes	T3a	N1b	M0	II
SYSUY0521	Female	12	PTC	bilateral	100	15	Yes	T3b	N1b	M0	I
SYSUM0027360	Female	23	PTC	bilateral	113	22	Yes	T3b	N1b	M0	I
SYSUTN00115	Female	31	PTC	left	41	17	Yes	T3b	N1b	M0	I
SYSUTN00599	Female	46	PTC	right	44	6	Yes	T3b	N1b	M0	I
SYSUTN00088	Male	33	PTC	bilateral	42	27	Yes	x	N1b	M0	I
SYSUTN00257	Female	40	NA	NA	29	2	Yes	x	N1b	M0	I
SYSUM0051111	Male	51	PTC	NA	27	4	Yes	x	N1b	M0	NA
SYSUM0056635	Female	57	PTC	NA	7	4	Yes	x	N1b	M0	NA
